# Supplementary material for: Optimized trimetallic benzotriazole-5-carboxylate MOFs with coordinately unsaturated active sites as an efficient electrocatalyst for the oxygen evolution reaction
Source: Royal Society of Chemistry journal article supplement (doi:10.1039/c9dt04295d), 2019-12-04
Supplement: c9dt04295d1.pdf [file c9dt04295d1.pdf]

Electronic Supporting Information

**Optimized Trimetallic Benzotriazole-5-carboxylate MOFs with Coordinately Unsaturated Active site as Efficient Electrocatalyst for Oxygen Evolution Reaction**

Jian-Tao Yuan, Juan-Juan Hou\*, Xue-Li Liu, Ya-Ru Feng, and Xian-Ming Zhang\*

*Key Laboratory of Magnetic Molecules & Magnetic Information Materials Ministry of Education, School of Chemical and Material Science, Shanxi Normal University, Linfen, 041004, China*

**Figure S1.** a) View of the  $\text{Co}_3(\text{OH})_2$  chain; b) The coordination environments of the cobalt ion; and c) The 3D framework of **Co<sub>3</sub>-btca** with 1D channels.

**Figure S2.** a) Powdered X-ray diffraction (PXRD) patterns of **Co<sub>3-x</sub>Fe<sub>x</sub>-btca**; b) PXRD patterns of **Co<sub>3-x</sub>Fe<sub>x</sub>-btca** in 1M KOH for 8 h.

**Figure S3.** a) Powdered X-ray diffraction (PXRD) patterns of **Co<sub>3-x-y</sub>Fe<sub>x</sub>Ni<sub>y</sub>-btca**; b) PXRD patterns of **Co<sub>3-x-y</sub>Fe<sub>x</sub>Ni<sub>y</sub>-btca** in 1M KOH for 8 h.

**Figure S4.** IR spectra of **M-btca**.

**Figure S5.** TG analysis of **M-btca**.

**Figure S6.** XPS survey spectra of a) **Co-btca**; b) **Co<sub>2.79</sub>Fe<sub>0.21</sub>-btca**; c) **Co<sub>2.36</sub>Fe<sub>0.19</sub>Ni<sub>0.45</sub>-btca**.

**Figure S7.** CV curve between 0.892–0.992 vs. RHE for a) **Co-btca**; b) **Co<sub>2.74</sub>Fe<sub>0.26</sub>-btca**; c) **Co<sub>2.77</sub>Fe<sub>0.23</sub>-btca**; and d) **Co<sub>2.79</sub>Fe<sub>0.21</sub>-btca**.

**Figure S8.** CV curve between 0.892–0.992 vs. RHE for a)  $\text{Co}_{1.25}\text{Fe}_{0.83}\text{Ni}_{0.92}\text{-btca}$ ; b)  $\text{Co}_{2.36}\text{Fe}_{0.19}\text{Ni}_{0.45}\text{-btca}$ .

**Figure S9.** The electrochemical impedance spectroscopy (EIS) of **M-btca** in 1 M KOH.

**Figure S10.** The equivalent model for fitting electrochemical impedance data of OER ( $\text{Co}_{2.36}\text{Fe}_{0.19}\text{Ni}_{2.45}\text{-btca}$ ).

**Figure S11.** Chronopotentiometric curves of **Co-btca**,  $\text{Co}_{3-x}\text{Fe}_x\text{-btca}$  and  $\text{Co}_{1.23}\text{Fe}_{0.83}\text{Ni}_{0.92}\text{-btca}$  at its overpotential corresponding to the current density of 10  $\text{mA cm}^{-2}$ .

**Figure S12.** XRD patterns of  $\text{Co}_{2.36}\text{Fe}_{0.19}\text{Ni}_{0.45}\text{-btca}$  on GCE ( $\phi = 3 \text{ mm}$ ) after the first 33 h, and 74 h with a scan rate of 5  $\text{mV s}^{-1}$ .

**Figure S13.** High resolution XPS spectra of Co2p in  $\text{Co}_{2.36}\text{Fe}_{0.19}\text{Ni}_{0.45}\text{-btca}$  after the first 33 h, and 74 h.

**Figure S14.** High resolution XPS spectra of Ni2p in  $\text{Co}_{2.36}\text{Fe}_{0.19}\text{Ni}_{0.45}\text{-btca}$  after the first 33 h, and 74 h.

**Figure S15.** High resolution XPS spectra of Fe2p in  $\text{Co}_{2.36}\text{Fe}_{0.19}\text{Ni}_{0.45}\text{-btca}$  after the first 33 h, and 74 h.

**Table S1.** Crystal data and structure refinement for **M-btca**.

**Table S2.** Bond lengths [ $\text{\AA}$ ] for **M-btca**.

**Table S3.** ICP analysis for **M-btca**.

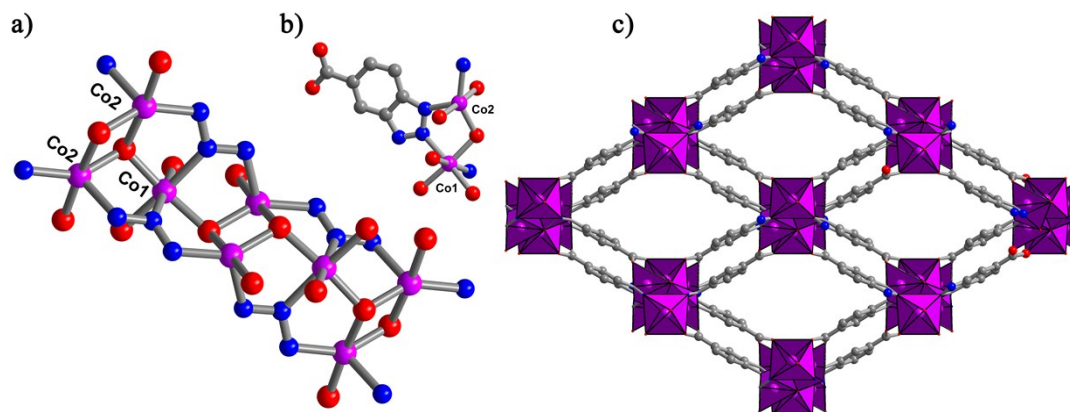

**Figure S1.** a). The 1D  $\text{Co}_3(\text{OH})_2$  chain in  $\text{Co}_3$ -btca; b). The coordination environments of the cobalt ion; c). The 3D framework of  $\text{Co}_3$ -btca with 1D channel.

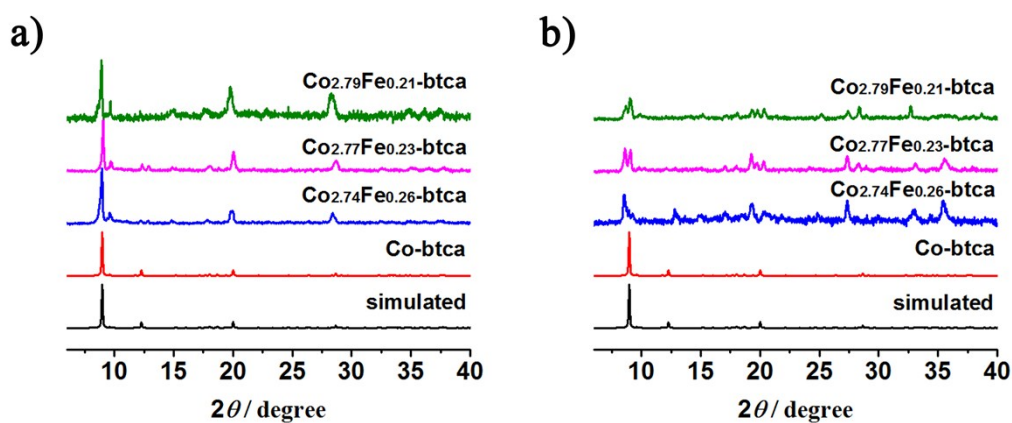

**Figure S2.** a). Powdered X-ray diffraction (PXRD) patterns of  $\text{Co}_{3-x}\text{Fe}_x$ -btca; b). PXRD patterns of  $\text{Co}_{3-x}\text{Fe}_x$ -btca in 1M KOH for 8 h.

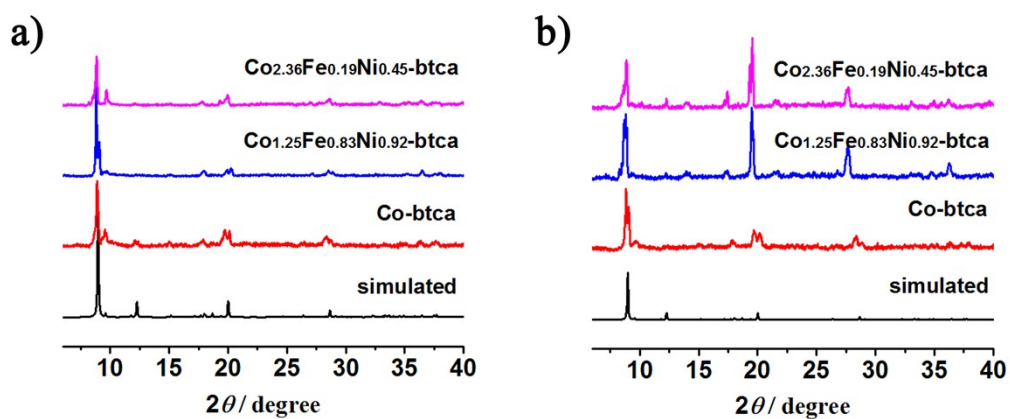

**Figure S3.** a) Powdered X-ray diffraction (PXRD) patterns of  $\text{Co}_{3-x-y}\text{Fe}_x\text{Ni}_y$ -btca; b) PXRD patterns of  $\text{Co}_{3-x-y}\text{Fe}_x\text{Ni}_y$ -btca in 1M KOH for 8 h.

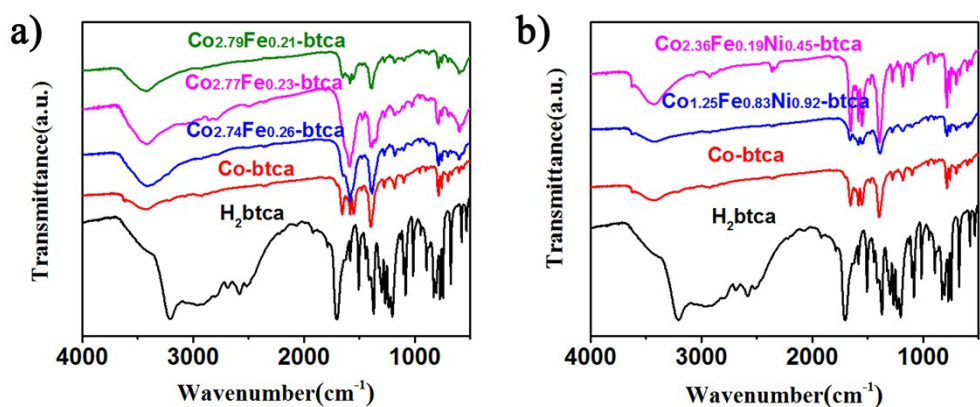

Figure S4. IR spectra of M-btca.

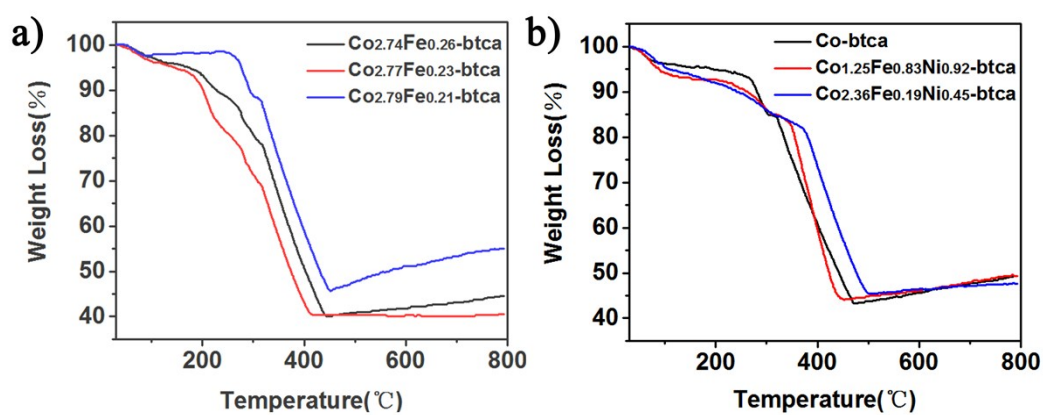

Figure S5. TG analysis of M-btca.

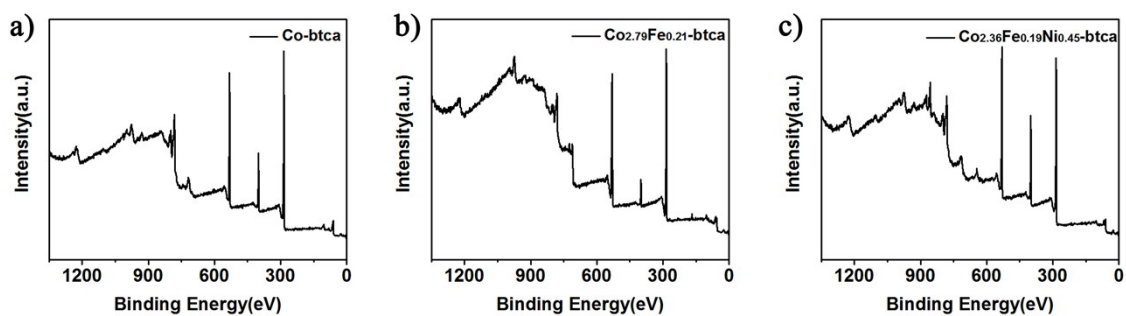

Figure S6. XPS survey spectra of (a) Co-btca, (b)  $\text{Co}_{2.79}\text{Fe}_{0.21}\text{-btca}$ , (c)  $\text{Co}_{2.36}\text{Fe}_{0.19}\text{Ni}_{0.45}\text{-btca}$ .

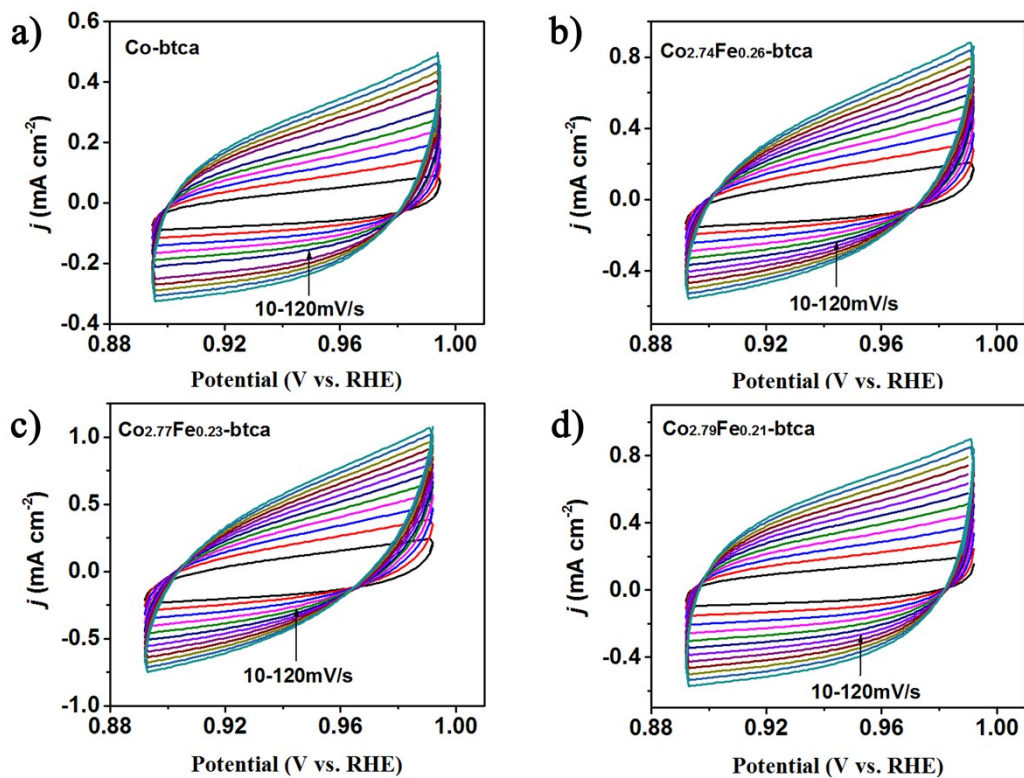

Figure S7. CV curve between 0.892–0.992 vs. RHE for a) **Co-btca**; b) **Co<sub>2.74</sub>Fe<sub>0.26</sub>-btca**; c) **Co<sub>2.77</sub>Fe<sub>0.23</sub>-btca** and d) **Co<sub>2.79</sub>Fe<sub>0.21</sub>-btca**.

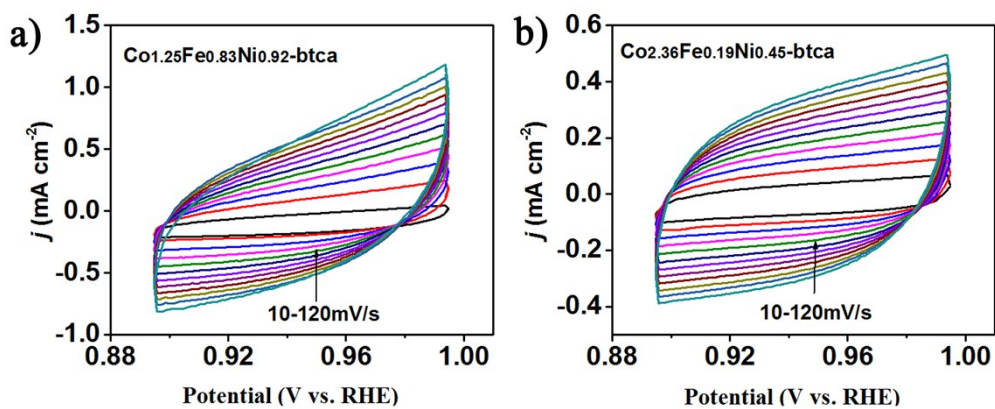

Figure S8. CV curve between 0.892–0.992 vs. RHE for a) **Co<sub>1.25</sub>Fe<sub>0.83</sub>Ni<sub>0.92</sub>-btca**; b) **Co<sub>2.36</sub>Fe<sub>0.19</sub>Ni<sub>0.45</sub>-btca**.

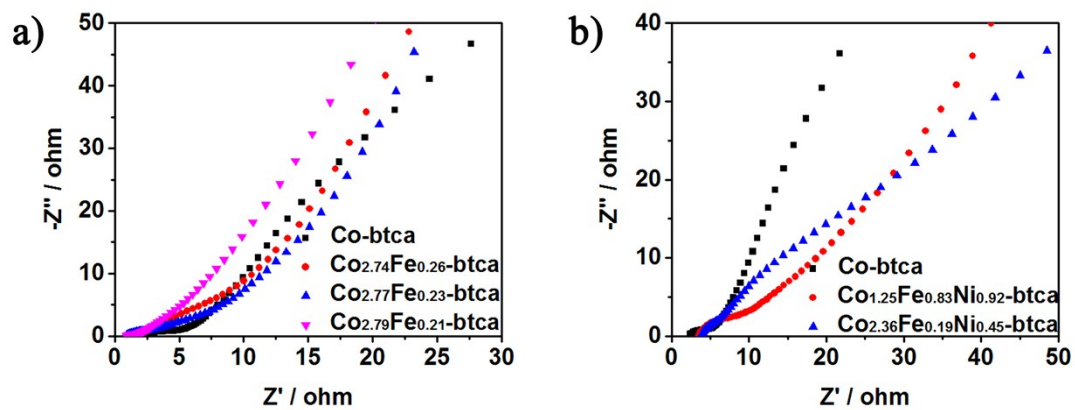

**Figure S9.** The electrochemical impedance spectroscopy (EIS) of **M-btca** in 1 M KOH.

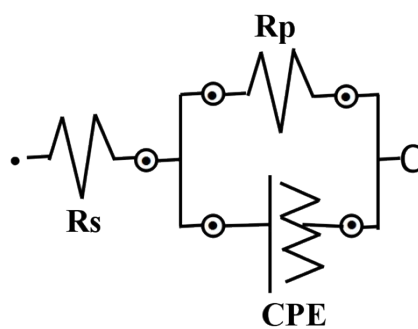

**Figure S10.** Equivalent circuit model for fitting electrochemical impedance data of OER (**Co<sub>2.36</sub>Fe<sub>0.19</sub>Ni<sub>2.45</sub>-btca**).

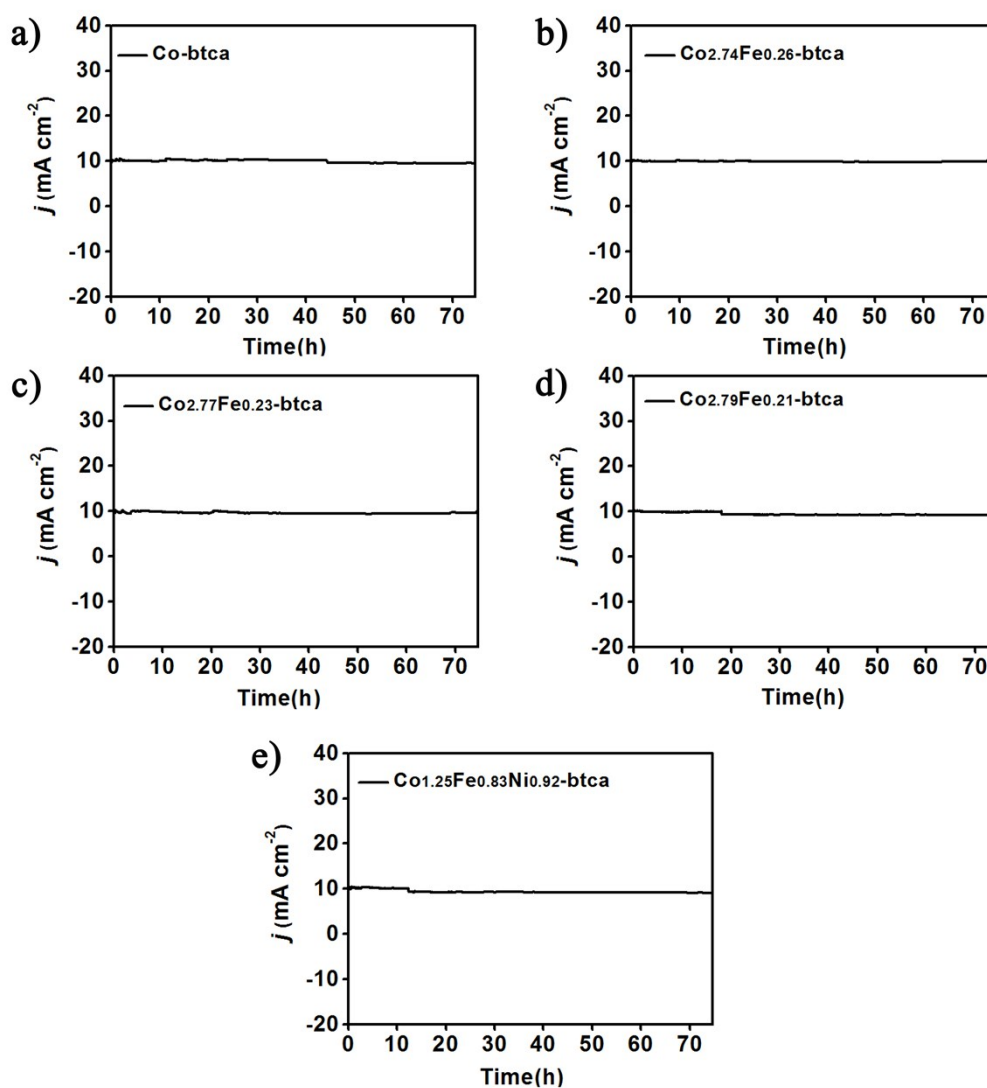

**Figure S11.** Chronopotentiometric curves of **Co-btca**, **Co<sub>3-x</sub>Fe<sub>x</sub>-btca** and **Co<sub>1.23</sub>Fe<sub>0.83</sub>Ni<sub>0.92</sub>-btca** at its overpotential corresponding and 10 mA cm<sup>-2</sup>.

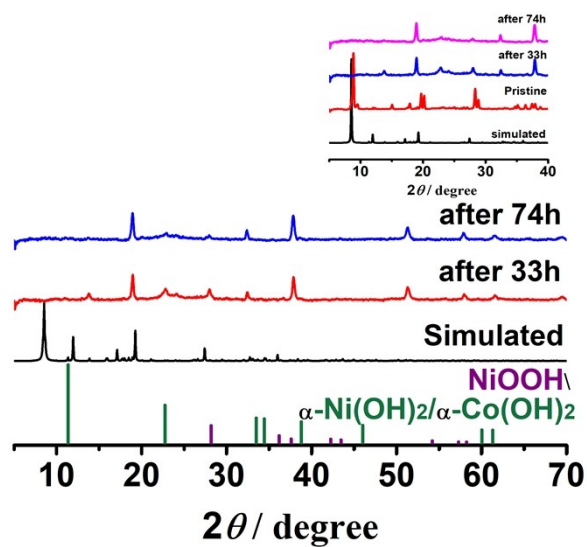

**Figure S12.** XRD patterns of  $\text{Co}_{2.36}\text{Fe}_{0.19}\text{Ni}_{0.45}\text{-btca}$  on GCE ( $\phi = 3 \text{ mm}$ ) after the first 33 h, and 74 h with a scan rate of  $5 \text{ mV s}^{-1}$ .

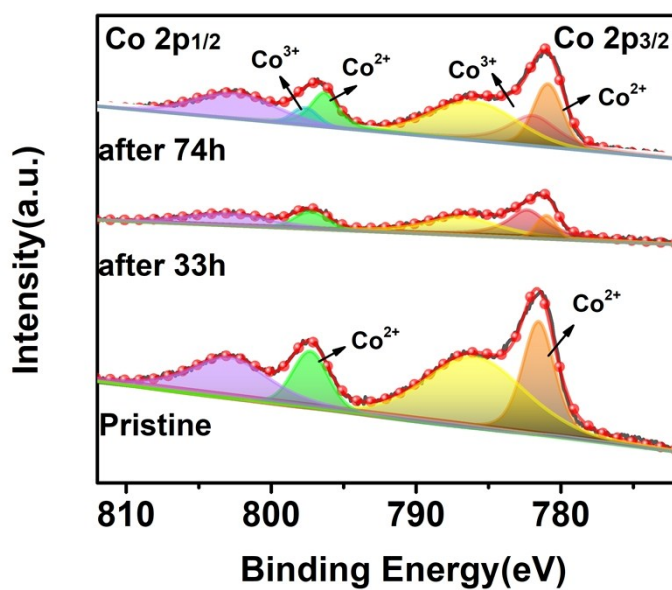

**Figure S13.** High resolution XPS spectra of  $\text{Co}2p$  in  $\text{Co}_{2.36}\text{Fe}_{0.19}\text{Ni}_{0.45}\text{-btca}$  after the first 33 h, and 74 h.



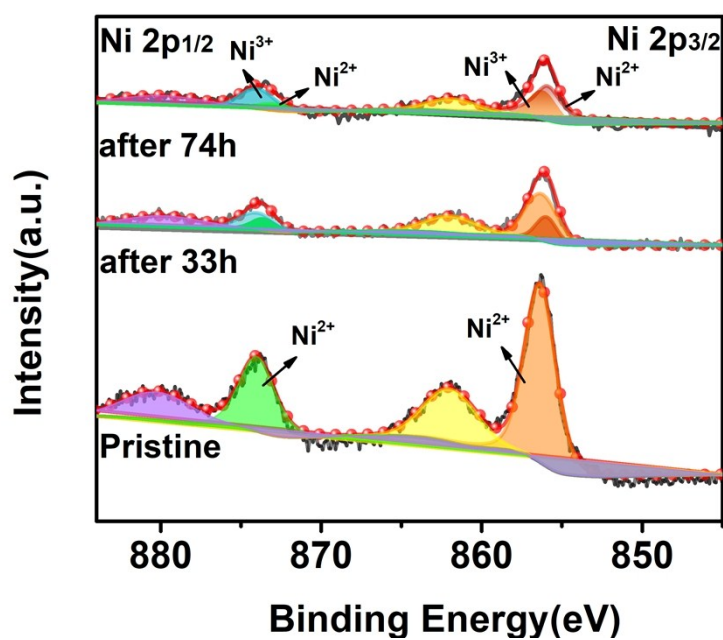

**Figure S14.** High resolution XPS spectra of Ni2p in  $\text{Co}_{2.36}\text{Fe}_{0.19}\text{Ni}_{0.45}\text{-btca}$  after the first 33 h, and 74 h.

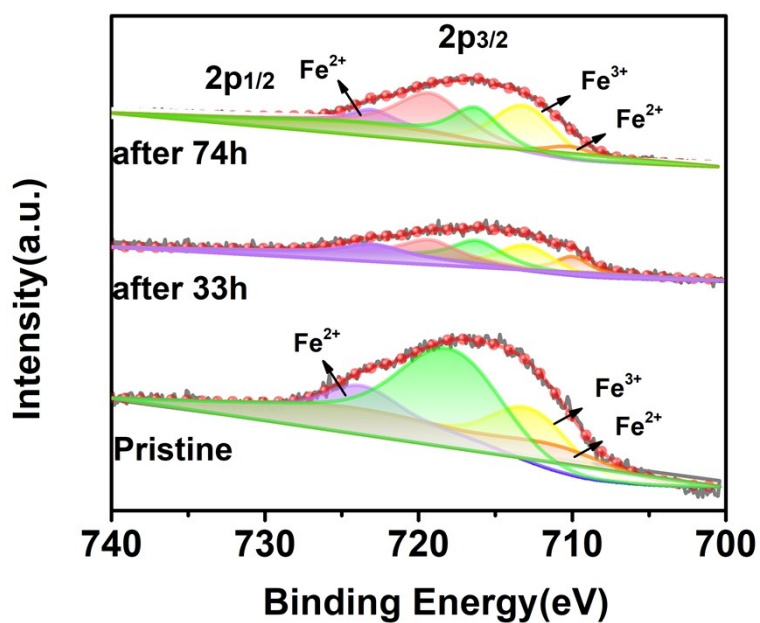

**Figure S15.** High resolution XPS spectra of Fe2p in  $\text{Co}_{2.36}\text{Fe}_{0.19}\text{Ni}_{0.45}\text{-btca}$  after the first 33 h, and 74 h.

**Table S1.** Summary of Crystal data and structure refinement Parameters for **M-btca**.

| Empirical formula                       | $C_{14}H_7Co_3N_6O_6$ | $C_{14}H_7Co_{2.79}Fe_{0.21}N_6O_6$ | $C_{14}H_7Co_{2.36}Fe_{0.19}Ni_{0.45}N_6O_6$ |
|-----------------------------------------|-----------------------|-------------------------------------|----------------------------------------------|
| Fw                                      | 532.05                | 531.40                              | 530.38                                       |
| Tem./K                                  | 293(2)                | 293(2)                              | 293(2)                                       |
| Crys.Sys.                               | Monoclinic            | Monoclinic                          | Monoclinic                                   |
| SpaceG.                                 | C2/c                  | C2/c                                | C2/c                                         |
| $a / \text{\AA}$                        | 18.453(2)             | 17.648(6)                           | 17.7685(9)                                   |
| $b / \text{\AA}$                        | 11.663(2)             | 13.038(4)                           | 12.7627(9)                                   |
| $c / \text{\AA}$                        | 11.0742(10)           | 11.183(2)                           | 11.2090(5)                                   |
| $\alpha / ^\circ$                       | 90                    | 90                                  | 90                                           |
| $\beta / ^\circ$                        | 94.348(9)             | 95.34(3)                            | 95.114(4)                                    |
| $\gamma / ^\circ$                       | 90                    | 90                                  | 90                                           |
| $V / \text{\AA}^3$                      | 2376.4(6)             | 2562.1(13)                          | 2531.8(2)                                    |
| Z                                       | 4                     | 4                                   | 4                                            |
| $\rho_{\text{calc}} / \text{mg/mm}^3$   | 1.487                 | 1.378                               | 1.391                                        |
| $\mu / \text{m/mm}^{-1}$                | 2.105                 | 1.936                               | 2.908                                        |
| $F(000)$                                | 1048                  | 1047                                | 1056                                         |
| $2\theta / ^\circ$                      | 3.494-26.994          | 3.622-26.990                        | 4.271-73.043                                 |
| Data/restr/para                         | 2563/0/132            | 2746/0/132                          | 2523/0/132                                   |
| S                                       | 1.020                 | 1.004                               | 1.051                                        |
| $R_1, {}^a wR_2 {}^b [I > 2\sigma(I)]$  | 0.0691, 0.1395        | 0.0591, 0.1126                      | 0.0651, 0.1747                               |
| $R_1, {}^a wR_2 {}^b [\text{all data}]$ | 0.1185, 0.1713        | 0.1093, 0.1338                      | 0.0893, 0.1888                               |

|                                                          |              |                |                |
|----------------------------------------------------------|--------------|----------------|----------------|
| $\Delta\rho_{max}/\Delta\rho_{min} / e \text{ \AA}^{-3}$ | 0.972/-0.719 | 0.687 / -0.643 | 0.725 / -0.765 |
|----------------------------------------------------------|--------------|----------------|----------------|

<sup>a</sup>  $R_1 = \sum||F_o|-|F_c||/\sum|F_o|$ ,    <sup>b</sup>  $wR_2 = [\sum w(F_o^2-F_c^2)^2/\sum w(F_o^2)^2]^{1/2}$

**Table S2.** Bond lengths [Å] for **M-btca**

|            | $C_{14}H_7Co_3N_6O_6$ | $C_{14}H_7Co_{2.79}Fe_{0.21}N_6O_6$ | $C_{14}H_7Co_{2.36}Fe_{0.19}Ni_{0.45}N_6$ |
|------------|-----------------------|-------------------------------------|-------------------------------------------|
|            | O <sub>6</sub>        |                                     |                                           |
| M(1)-O(4a) | 2.029(4)              | 2.062(3)                            | 2.055(3)                                  |
| M(1)-O(4)  | 2.030(4)              | 2.062(3)                            | 2.055(3)                                  |
| M(1)-O(2a) | 2.110(5)              | 2.074(4)                            | 2.085(3)                                  |
| M(1)-O(2)  | 2.110(5)              | 2.074(4)                            | 2.085(3)                                  |
| M(1)-N(2b) | 2.150(5)              | 2.131(5)                            | 2.133(4)                                  |
| M(1)-N(2c) | 2.150(5)              | 2.131(5)                            | 2.133(4)                                  |
| M(2)-O(4)  | 2.019(4)              | 2.013(4)                            | 2.005(3)                                  |
| M(2)-O(1)  | 2.054(5)              | 2.037(4)                            | 2.036(4)                                  |
| M(2)-N(1d) | 2.084(5)              | 2.072(5)                            | 2.075(4)                                  |
| M(2)-N(3b) | 2.123(5)              | 2.079(4)                            | 2.079(4)                                  |
| M(2)-O(4e) | 2.176(5)              | 2.171(4)                            | 2.154(3)                                  |

Symmetry transformations used to generate equivalent atoms: a) -x+1, -y+2, -z+2; b) -x+2, -y+2, -z+2; c) x-1, y, z; d) -x+1, -y+1, -z+2; e) -x, -y, -z+1; f) x+1, y, z.

**Table S3.** ICP analysis for **M-btca**.

|          | <b>Co<sub>2.74</sub>Fe<sub>0.26</sub>-btca</b>                  | <b>Co<sub>2.77</sub>Fe<sub>0.23</sub>-btca</b>                  | <b>Co<sub>2.79</sub>Fe<sub>0.21</sub>-btca</b> |
|----------|-----------------------------------------------------------------|-----------------------------------------------------------------|------------------------------------------------|
| Wt%      | Co:17                                                           | Co:17.47                                                        | Co:18.41                                       |
|          | Fe:1.52                                                         | Fe:1.24                                                         | Fe:1.43                                        |
| Co/Fe    | 0.26:2.74                                                       | 0.23:2.77                                                       | 0.21:2.79                                      |
|          | <b>Co<sub>1.25</sub>Fe<sub>0.83</sub>Ni<sub>0.92</sub>-btca</b> | <b>Co<sub>2.36</sub>Fe<sub>0.19</sub>Ni<sub>0.45</sub>-btca</b> |                                                |
|          | Co:17.81                                                        | Co:19.04                                                        |                                                |
| Wt%      | Fe:11.32                                                        | Fe:1.47                                                         |                                                |
|          | Ni:12.01                                                        | Ni:3.64                                                         |                                                |
| Co/Fe/Ni | 0.83:1.25:0.92                                                  | 0.19:2.36:0.45                                                  |                                                |
